# Supplementary material for: Identification and Expression Analysis of Gretchen Hagen 3 (GH3) in Kiwifruit (Actinidia chinensis) During Postharvest Process
Source: PubMed Central journal article supplement (PMC6918289; doi:10.3390/plants8110473), 2019-11-06
Supplement: plants-08-00473-s001.pdf [file plants-08-00473-s001.pdf]

**Table S1.** Primers for qRT-PCR.

| Primer name     | Forward sequence       | Reverse sequence        |
|-----------------|------------------------|-------------------------|
| <i>AcGH3.1</i>  | TACCTCCGCCGATTCAAATC   | GATGGGATGTGCCGACAAGAT   |
| <i>AcGH3.2</i>  | GGGGCTCTATTCCTCTTCAT   | TCGTTCGGGCTCGTGTAT      |
| <i>AcGH3.3</i>  | AGGGTCTGTACTTCCTGTTTCG | TGTAGACGTTGTAGGGATCGTAG |
| <i>AcGH3.4</i>  | AAGGAGTGCGAAGGTGAGAAC  | AAGTAGTCGAGGGTCGGGAT    |
| <i>AcGH3.5</i>  | TCAATTCCTCCTTCGGTCTAT  | AACGTCCCAGCTTCAACAA     |
| <i>AcGH3.6</i>  | CATCAAATCGGAGGCTAAG    | GTATGAGTCAGGGCACAAAA    |
| <i>AcGH3.7</i>  | ATCTCCCATCCTCTGTTCCC   | GCAATGACCTCCTCCCTATC    |
| <i>AcGH3.8</i>  | AGAAACCGTCCCTTCAACCC   | GCACCAACCCTAAGAACCTC    |
| <i>AcGH3.9</i>  | TTCCTCCGAGTGTTACTTTGGT | CCTTAGCCACCTCCTCTTCTTC  |
| <i>AcGH3.10</i> | CCCAAGAATCACCATACCCAG  | CGGAACCAATCCAAACCAG     |
| <i>AcGH3.11</i> | AGTTCATCTACAGCAGCAAG   | TCAGGACCAAATATCACTTC    |
| <i>AcGH3.12</i> | TCATCTACAGCAGCAAGCAG   | GGAAGTCAGGACCAAATATCAC  |
| <i>AcActin</i>  | TGGAATGGAAGCTGCAGGA    | CACCACTGAGCACAATGTTGC   |
